# Supplementary material for: Anisotropic and super-strong conductive hydrogels enabled by mechanical stretching combined with the Hofmeister effect
Source: Royal Society of Chemistry journal article supplement (doi:10.1039/d2ta09973j), 2023-01-01
Supplement: d2ta09973j1.pdf [file d2ta09973j1.pdf]

## Supporting Information

### **Anisotropic and super-strong conductive hydrogels enabled by mechanical stretching combined with the Hofmeister effect**

*Bingyan Guo, Yukuan Wu, Shaoshuai He, Changyong Wang, Mengmeng Yao, Qingyu Yu, Xiaojun Wu, Chaojie Yu, Min Liu, Lei Liang, Zhongming Zhao, Yuwei Qiu, Fanglian Yao, Hong Zhang\*, Junjie Li\**

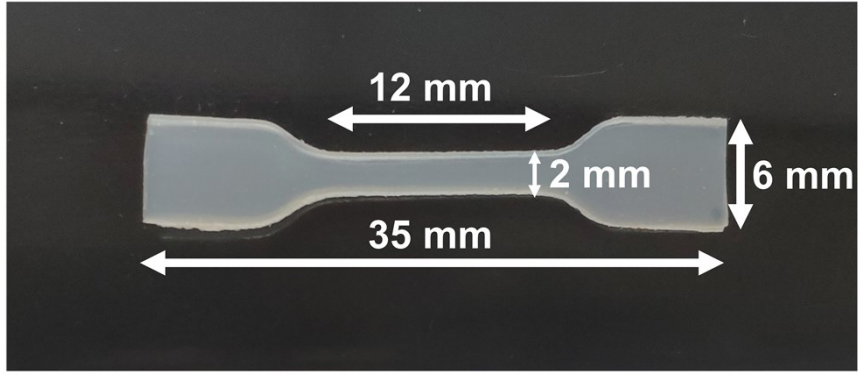

**Fig. S1** The dumbbell shape for mechanical tests.

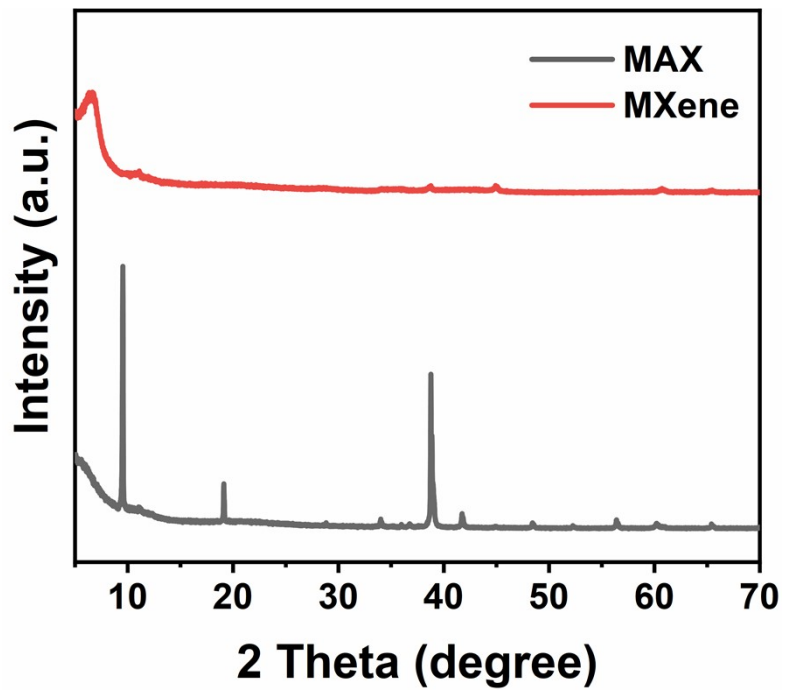

**Fig. S2** XRD patterns of  $\text{Ti}_3\text{AlC}_2$  and  $\text{Ti}_3\text{C}_2\text{T}_x$ .

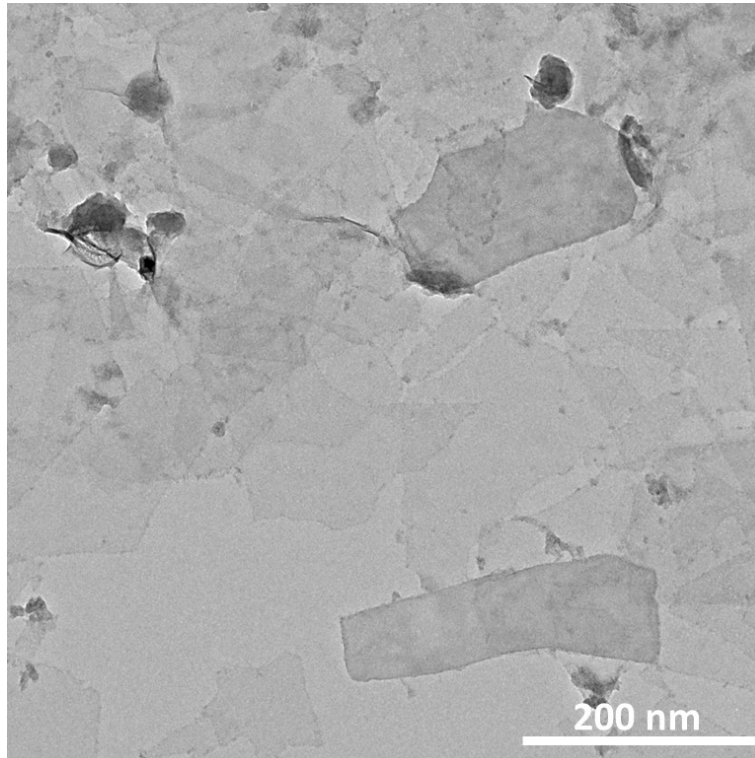

**Fig. S3** TEM image of the Ti<sub>3</sub>C<sub>2</sub>T<sub>x</sub>.

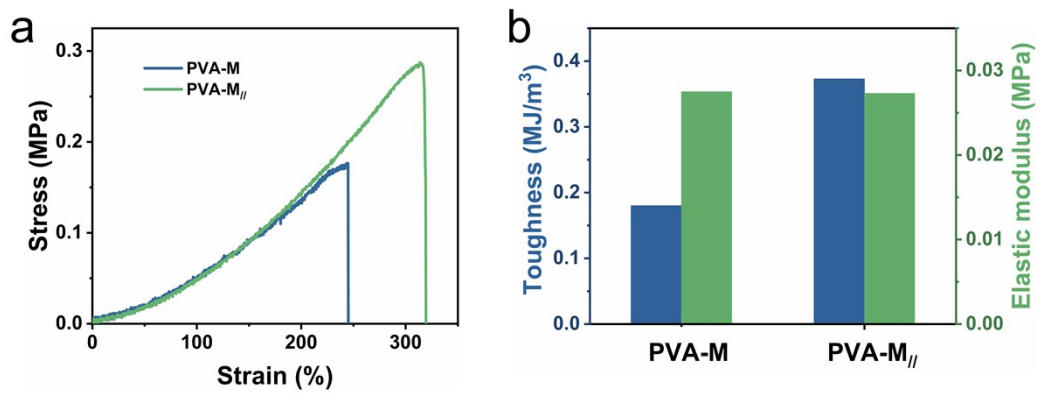

**Fig. S4** (a) The tensile stress-strain curves of PVA-M hydrogel and PVA-M<sub>//</sub> hydrogel. (b) Toughness and elastic modulus of PVA-M hydrogel and PVA-M<sub>//</sub> hydrogel.

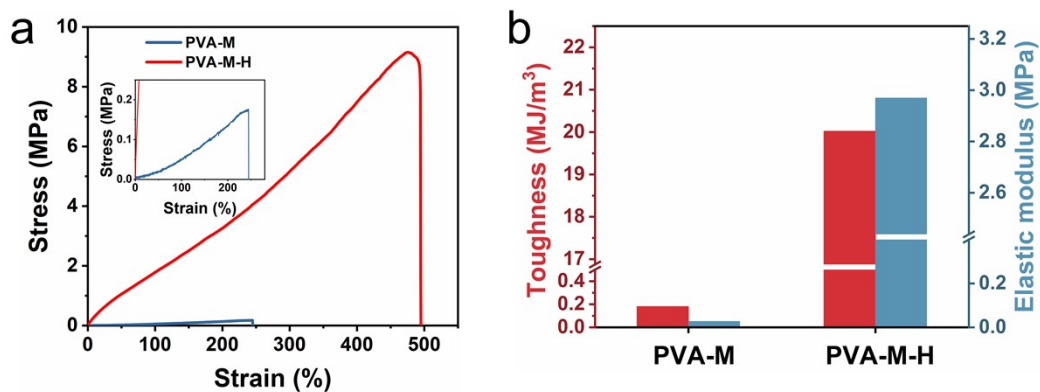

**Fig. S5** (a) The tensile stress–strain curves of PVA-M hydrogel and PVA-M-H hydrogel. (b) Toughness and elastic modulus of PVA-M hydrogel and PVA-M-H hydrogel.

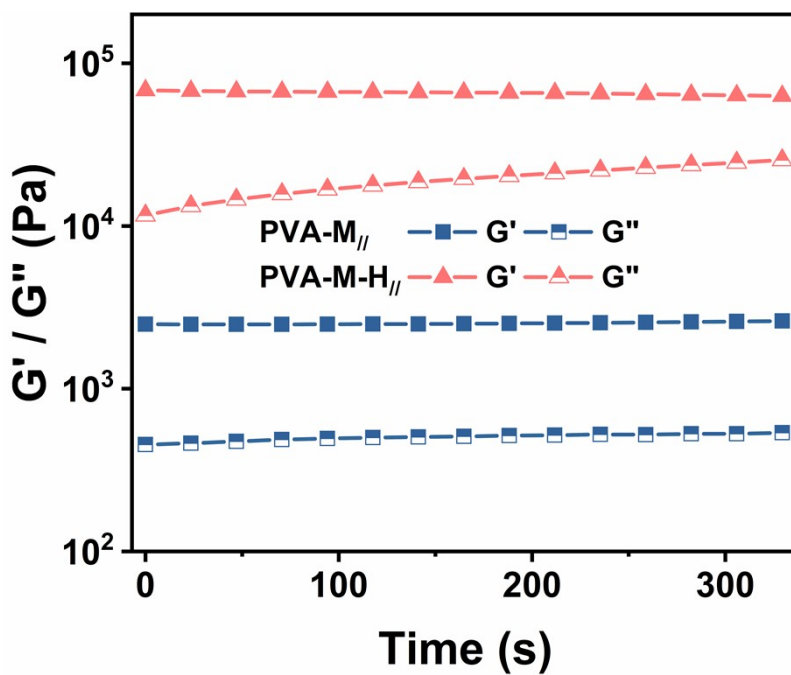

**Fig. S6** Rheological behavior of PVA-M<sub>//</sub> hydrogel before and after immersing in Na<sub>3</sub>Cit solution.

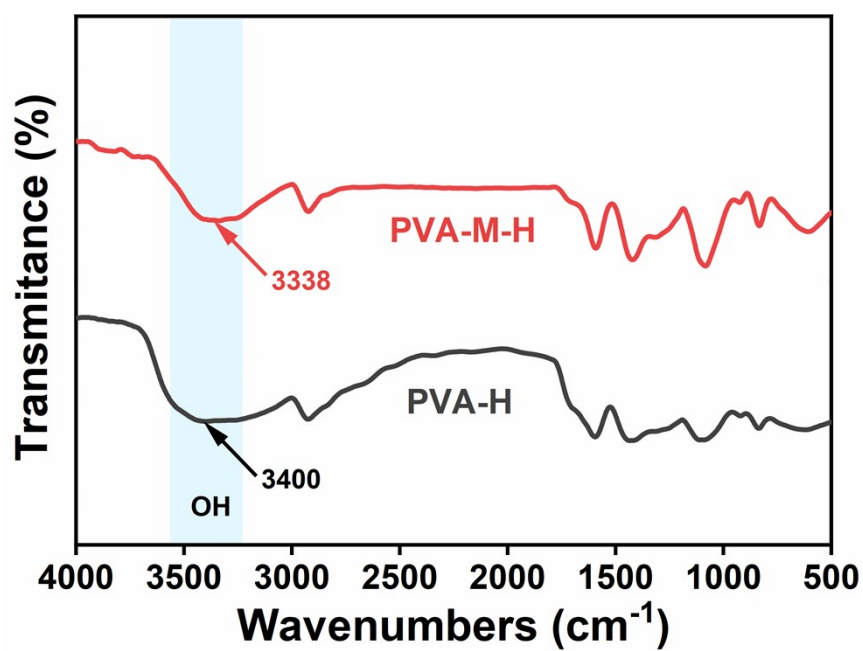

**Fig. S7** FTIR spectra of PVA-H hydrogel, and PVA-M-H hydrogel.

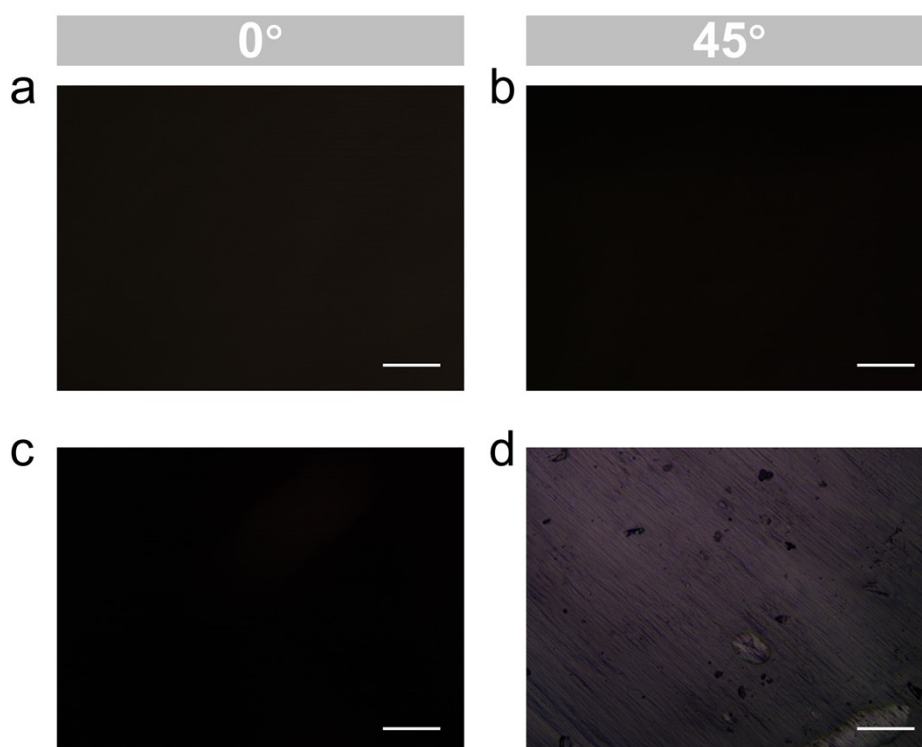

**Fig. S8** (a), (b) Polarized microscope images of the isotropic PVA-H hydrogel. (c), (d) Polarized microscope images of the anisotropic PVA-H hydrogel (scale bars: 200  $\mu\text{m}$ ).

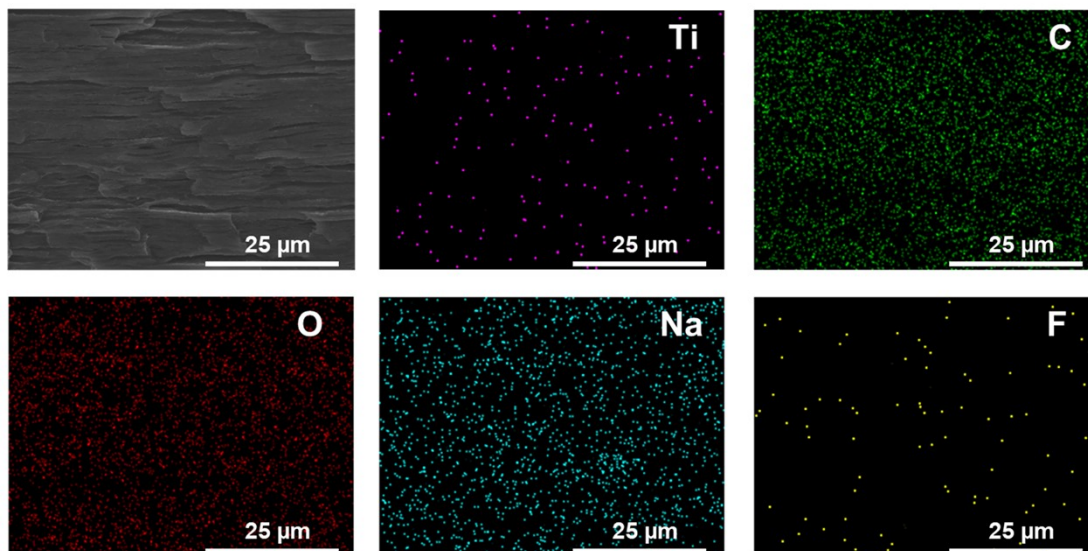

**Fig. S9** SEM image and the EDS elemental mapping of Ti, C, O, Na, and F of the cross-sectional of the anisotropic PVA-M-H hydrogel.

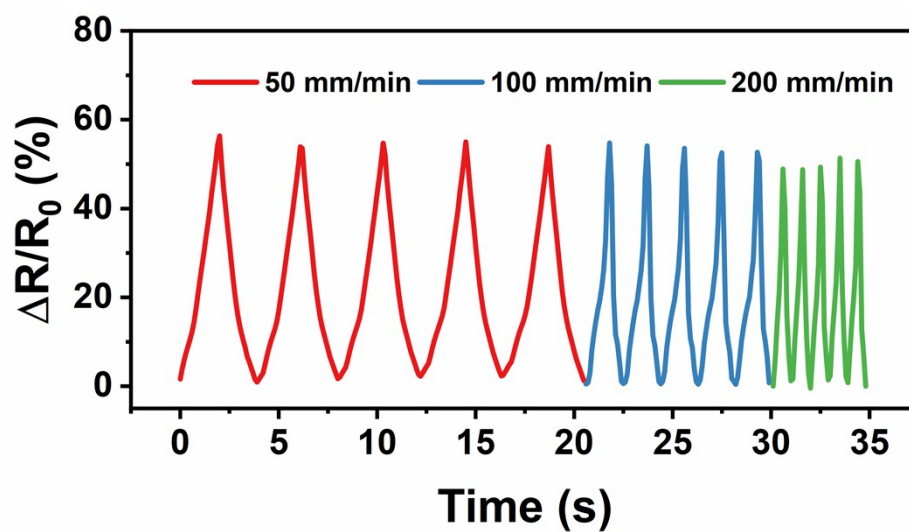

**Fig. S10** Relative resistance changes ( $\Delta R/R_0$ ) of PVA-M-H// hydrogel at various stretching rate.

**Table S1** Comparison of PVA-M-H<sub>//</sub> hydrogel to reported tough conductive hydrogels

| Materials                      | Stress<br>(MPa) | Strain<br>(%) | Toughness<br>(MJ/m <sup>3</sup> ) | Elastic modulus<br>(MPa) | Reference        |
|--------------------------------|-----------------|---------------|-----------------------------------|--------------------------|------------------|
| mechanically trained PVA       | 5.2             | 170           | N/A                               | 0.2                      | 1                |
| HPC/PVA-NaCl                   | 1.25            | 800           | 5.8                               | 0.25                     | 2                |
| PVA-CNF-NaCl                   | 1.4             | 660           | 5.25                              | 0.4                      | 3                |
| PVA-Ph/PEDOT                   | 0.8             | 550           | 1.1                               | N/A                      | 4                |
| HA-10PVA                       | 16.1            | 1,800         | 200                               | N/A                      | 5                |
| PVA/NaCl                       | 1.5             | 550           | 4.7                               | 0.208                    | 6                |
| PAAm/Ca <sup>2+</sup> -Alg     | 32              | 62.5          | N/A                               | 319                      | 7                |
| P(AGA-co-AAm)-Fe <sup>3+</sup> | 12.1            | 410           | N/A                               | 36.1                     | 8                |
| PAM/MC-As                      | 4.4             | 690           | 19.3                              | 3.8                      | 9                |
| DN-Sul-Na                      | 7.5             | 210           | N/A                               | 42.5                     | 10               |
| P(AM-co-AA)/CS                 | 5.1             | 1225          | 32.1                              | 1.13                     | 11               |
| s-gel-25%                      | 40              | 240           | N/A                               | 40                       | 12               |
| PACT-P                         | 0.0752          | 600           | N/A                               | N/A                      | 13               |
| PMZn-GL                        | 0.875           | 247           | 0.08                              | 0.001                    | 14               |
| PAC@200%-V                     | 0.55            | 1585          | 5.75                              | 0.27                     | 15               |
| <b>PVA-M-H<sub>//</sub></b>    | <b>16.57</b>    | <b>464</b>    | <b>39.23</b>                      | <b>8.58</b>              | <b>This work</b> |

1. S. Lin, J. Liu, X. Liu and X. Zhao, *Proc. Natl. Acad. Sci. USA*, 2019, **116**, 10244-10249.
2. Y. Zhou, C. Wan, Y. Yang, H. Yang, S. Wang, Z. Dai, K. Ji, H. Jiang, X. Chen and Y. Long, *Adv. Funct. Mater.*, 2019, **29**, 1806220.
3. Y. Ye, Y. Zhang, Y. Chen, X. Han and F. Jiang, *Adv. Funct. Mater.*, 2020, **30**, 2003430.
4. H. Wei, M. Lei, P. Zhang, J. Leng, Z. Zheng and Y. Yu, *Nat. Commun.*, 2021, **12**, 2082.
5. M. Hua, S. Wu, Y. Ma, Y. Zhao, Z. Chen, I. Frenkel, J. Strzalka, H. Zhou, X. Zhu and X. He, *Nature*, 2021, **590**, 594-599.
6. Q. Wang, Q. Zhang, G. Wang, Y. Wang, X. Ren and G. Gao, *ACS Appl. Mater. Interfaces*, 2022, **14**, 1921-1928.
7. W. Cui, M. Pi, R. Zhu, Z. Xiong and R. Ran, *J. Mater. Chem. A*, 2021, **9**, 20362-20370.
8. V. T. Tran, M. T. I. Mredha, S. K. Pathak, H. Yoon, J. Cui and I. Jeon, *ACS Appl. Mater. Interfaces*,

2019, **11**, 24598-24608.

9. W. Chen, D. Li, Y. Bu, G. Chen, X. Wan and N. Li, *Cellulose*, 2020, **27**, 1113-1126.
10. X. Sun, Y. Liang, L. Ye and H. Liang, *J. Mat. Chem. B*, 2021, **9**, 7751-7759.
11. Y. Liang, L. Ye, X. Sun, Q. Lv and H. Liang, *ACS Appl. Mater. Interfaces*, 2020, **12**, 1577-1587.
12. P. Lin, T. Zhang, X. Wang, B. Yu and F. Zhou, *Small*, 2016, **12**, 4386-4392.
13. W. Wang, X. Deng and C. Luo, *J. Mater. Chem. C*, 2023, **11**, 196-203.
14. Y. Feng, H. Liu, W. Zhu, L. Guan, X. Yang, A. V. Zvyagin, Y. Zhao, C. Shen, B. Yang and Q. Lin, *Adv. Funct. Mater.*, 2021, **31**, 2105264.
15. L. Chen, X. Chang, J. Chen and Y. Zhu, *ACS Appl. Mater. Interfaces*, 2022, **14**, 43833-43843.
